# Supplementary material
Source: publisher site journal article supplement (https://www.dovepress.com/article/549601)
Supplement: Supplementary file 1 [file 549601_Supplementary%20Materials_1.docx]

**SUPPLEMENTARY MATERIALS**

**1, All involved hospitals in the study.**

**Shandong province**

The Second People's Hospital of Liaocheng, Shandong, China.

Liaocheng People's Hospital, Liaocheng, Shandong, China.

Linqing People's Hospital, Shandong, China.

Yidu Central Hospital of Weifang, Shandong, China.

Qingdao Central Hospital, Shandong, China.

The Third People's Hospital of Liaocheng, Shandong, China.

Tengzhou Central Hospital, Shandong, China.

The Third People's Hospital of Shenxian, Shandong, China.

Shandong University Qilu Hospital, Shandong, China

Xiajin People's Hospital, Shandong, China.

Zibo Central Hospital, Shandong, China.

Shanting District People's Hospital, Shandong, China.

People's Hospital of Rizhao, Shandong, China.

Linyi Hospital of Traditional Chinese Medicine, Shandong, China.

Zaozhuang Municipal Hospital, Shandong, China.

Shandong Provincial Third Hospital, Shandong, China.

Binzhou Medical University Hospital, Shandong, China.

Jining First People's Hospital, Shandong, China.

**Shanghai**

Xinhua Hospital Affiliated to Shanghai Jiaotong University School of Medicine. Shanghai, China.

Huashan Hospital, Fudan University, Shanghai, China.

Shanghai Donglei Brain Hospital, Shanghai, China

Qingpu Branch of Zhongshan Hospital, Fudan University, Shanghai, China.

**Zhejiang province**

Shaoxing Second Hospital, Zhejiang,China.

The First People's Hospital of Huzhou, Zhejiang,China.

Taizhou Hospital of Zhejiang Province Affiliated to Wenzhou Medical University, Zhejiang,China.

The First Hospital of Jiaxing, Zhejiang,China.

**Fujian province**

The First Affiliated hospital of Fujian Medical University, Fujian , China.

Ningde People's Hospital, Fujian, China.

Quanzhou First Hospital Affiliated to Fujian Medical University, Fujian, China

**Anhui province**

Central Hospital of Bengbu, Anhui, China.

Affiliated Anqing First People's Hospital of Anhui Medical University, Anhui, China.

People's Hospital of Chizhou, Anhui, China.

Hefei First People's Hospital, Anhui, China.

**Jiangxi province**

The First Hospital of Nanchang, Jiangxi, China.

The First People's Hospital of Fuzhou, Jiangxi, China.

Yichun People's Hospital, Jiangxi, China.

Ganzhou People's Hospital, Jiangxi, China.

.

**Jiangsu province**

The First People's Hospital of Yancheng, The Fourth Affiliated Hospital of Nantong University, Jiangsu, China.

Xuzhou Children's Hospital, Xuzhou Medical University, Jiangsu, China.

The Affiliated Hospital of Xuzhou Medical University，Jiangsu, China.

Xuzhou Central Hospital, Jiangsu, China

Sihong Fenjinting Hospital, Jiangsu, China.

Jiangyin Hospital Affiliated to Nanjing University of Chinese Medicine, Jiangsu, China

The Second People's Hospital of Huaian, Jiangsu, China

The First People's Hospital of Lianyungang, Jiangsu, China.

The Third Peoples' Hospital of Xuzhou, Jiangsu, China

The First Peoples' Hospital of Xuzhou, Jiangsu, China

The Peoples' Hospital of Wuxi, Jiangsu, China

The Peoples' Hospital of Jiangyin, Jiangsu, China

Lianshui County People's Hospital, Jiangsu,China.

Jiangdu People's Hospital of Yangzhou, Jiangsu, China.

The Affiliated Taizhou People's Hospital of Nanjing Medical University, Jiangsu, China.

The Third People's Hospital of Nantong, Jiangsu, China

**2, supplementary Table 1.** knowledge, attitude and practice dimensions.

| **Knowledge** | | | **Very familiar** | **Heard of** | **Not familiar** |
| --- | --- | --- | --- | --- | --- |
| K1. Hemifacial spasm refers to paroxysmal, involuntary twitching of facial muscles (orbicularis oculi, facial muscles, orbicularis oris), affecting one or both sides of the face. Symptoms worsen during emotional stress or tension, and severe cases can lead to difficulty in opening the eyes, crooked mouth angle, and pulsatile tinnitus in the ear. | | | 198 (88.79) | 24 (10.76) | 1. (0.45) |
| K2. Hemifacial spasm includes two types: typical and atypical. Typical hemifacial spasm starts with spasms in the eyelid and gradually progresses downward to involve the lower facial muscles such as the cheek muscles. In contrast, atypical hemifacial spasm begins with spasms in the lower facial muscles and progresses upward to eventually affect the eyelids and forehead muscles. Clinically, atypical hemifacial spasm is less common, with the vast majority being typical hemifacial spasm. | | | 174 (78.03) | 43 (19.28) | 1. (2.69) |
| K3. MVD is currently the method most likely to completely cure hemifacial spasm. | | | 194 (87) | 24 (10.76) | 1. (2.24) |
| K4. Preoperative electrophysiological assessment aids in distinguishing hemifacial spasm and objectively understanding the functional levels of the facial and vestibular nerves. Electrophysiological assessments mainly include auditory brainstem response (ABR), electromyography (EMG), and brainstem auditory evoked potential (BAEP). ABR exhibits specific electrophysiological features in hemifacial spasm, with a latency period generally around 10 ms, providing supplementary diagnostic value for hemifacial spasm. | | | 118 (52.91) | 87 (39.01) | 1. 8.07) |
| K5. Patients with hemifacial spasm undergoing MVD surgery must undergo imaging evaluation preoperatively, preferably with MRI. For patients unable to undergo MRI, a head CT scan should be performed. | | | 185 (82.96) | 34 (15.25) | 1. (1.79) |
| K6. Patients treated with medication or botulinum toxin who experience poor efficacy, ineffectiveness, drug allergies, or toxic side effects should consider surgery. | | | 180 (80.72) | 37 (16.59) | 1. (2.69) |
| K7. Severe hematologic disorders or significant organ dysfunctions (heart, lungs, kidneys, or liver) are contraindications for MVD surgery. | | | 181 (81.17) | 35 (15.7) | 1. (3.14) |
| K8. The main criteria for concluding MVD surgery are twofold: ① Complete exploration of the facial nerve in Zone 1-4. ② Isolation of all vessels in contact with the facial nerve. For patients undergoing electrophysiological monitoring, efforts should also be made to ensure complete disappearance of the ABR waveform. For patients with persistent ABR waveforms, thorough exploration throughout the procedure is recommended to avoid missing vessels, with the possible need for adjunctive nerve combing. | | | 137 (61.43) | 71 (31.84) | 1. (6.73) |
| K9. Intracranial hemorrhage is the most serious complication within 24 hours after MVD surgery. Patients showing corresponding symptoms should undergo immediate re-examination with a head CT scan and appropriate measures. In cases of postoperative hypotension, patients should be placed in a supine position or with the head elevated, while those experiencing nausea and vomiting should have their head tilted to one side to prevent aspiration and receive appropriate symptomatic treatment. | | | 188 (84.3) | 33 (14.8) | 2 (0.9) |
| **Attitude** | **Strongly agree** | **Agree** | **Neutral** | **Disagree** | **Strongly disagree** |
| A1. I am confident and capable of accurately diagnosing hemifacial spasm (P). | 122 (54.71) | 84 (37.67) | 1. 7.62) |  |  |
| A2. I believe MVD plays a crucial role in the treatment plan of patients with hemifacial spasm (P). | 167 (74.89) | 53 (23.77) | 1. (1.35) |  |  |
| A3. I have sufficient confidence and ability to manage the complications of MVD surgery for hemifacial spasm (P). | 105 (47.09) | 88 (39.46) | 29 (13) |  | 1. (0.45) |
| A4. The operation of MVD surgery presents some difficulty and challenges for me (N). | 67 (30.04) | 107 (47.98) | 36 (16.14) | 11 (4.93) | 1. (0.9) |
| A5. I am concerned about the complications of MVD surgery for hemifacial spasm (N). | 39 (17.49) | 100 (44.84) | 67 (30.04) | 11 (4.93) | 1. (2.69) |
| A6. Cases of recurrence after MVD surgery for hemifacial spasm make me feel anxious and nervous (N). | 44 (19.73) | 112 (50.22) | 55 (24.66) | 9 (4.04) | 1. (1.35) |
| A7. I am willing to attend lectures or academic conferences related to MVD surgery for hemifacial spasm (P). | 101 (45.29) | 107 (47.98) | 13 (5.83) | 1. (0.9) |  |
| A8. I am willing to share and exchange my information and insights on MVD surgery for hemifacial spasm with other medical colleagues (P). | 115 (51.57) | 97 (43.5) | 10 (4.48) | 1. (0.45) |  |
| A9. I believe that a thorough understanding of MVD surgery for hemifacial spasm is crucial for enhancing the comprehensive qualities of neurosurgeons (P). | 129 (57.85) | 83 (37.22) | 1. 4.93) |  |  |
| A10. I believe neurosurgeons should actively participate in research and clinical practice related to MVD surgery for hemifacial spasm to improve patient treatment outcomes (P). | 133 (59.64) | 84 (37.67) | 1. (2.69) |  |  |
| A11. I support the development of more detailed and personalized operation guidelines for MVD surgery for hemifacial spasm to enhance the individualized treatment levels of patients (P). | 147 (65.92) | 71 (31.84) | 5 (2.24) |  |  |
| **Practice** | **N (%)** | | | | |
| **Always** | **Often** | **Sometimes** | **Rarely** | **Never** |
| P1. I can accurately diagnose patients with hemifacial spasm and distinguish it from other similar conditions (P). | 82 (36.77) | 107 (47.98) | 22 (9.87) | 8 (3.59) | 1. (1.79) |
| P2. Before MVD surgery, I arrange for patients to undergo electrophysiological assessment (P). | 72 (32.29) | 72 (32.29) | 35 (15.7) | 33 (14.8) | 1. 4.93) |
| P3. Before MVD surgery, I arrange for patients to undergo imaging examinations (MRI or CT) (P). | 198 (88.79) | 18 (8.07) | 5 (2.24) |  | 1. (0.9) |
| P4. During MVD surgery, we will conduct real-time monitoring of auditory brainstem response (ABR), electromyography (EMG), and brainstem auditory evoked potential (BAEP) (P). | 84 (37.67) | 58 (26.01) | 26 (11.66) | 29 (13) | 1. 11.66) |
| P5. After MVD surgery, we (I/We) will comprehensively observe patients for vital signs, consciousness, presence of facial palsy, hoarseness, coughing, vomiting, and other symptoms (P). | 188 (84.3) | 23 (10.31) | 5 (2.24) | 4 (1.79) | 1. (1.35) |
| P6. We will advise postoperative patients to be cautious about aspiration (P). | 179 (80.27) | 34 (15.25) | 6 (2.69) | 1 (0.45) | 1. (1.35) |
| P7. I will study the latest research or guidelines on hemifacial spasm and MVD surgery (P). | 128 (57.4) | 65 (29.15) | 22 (9.87) | 6 (2.69) | 1. (0.9) |
| P8. I will actively seek out the latest information and technologies regarding hemifacial spasm and MVD surgery (P). | 122 (54.71) | 68 (30.49) | 26 (11.66) | 6 (2.69) | 1 (0.45) |

“p” means positive, “N” means negative.

**supplementary Table 2. Model fit.**

| **Indices** | **Reference** | **Measured results** |
| --- | --- | --- |
| **CMIN/DF** | 1-3 excellent, 3-5 good | 2.101 |
| **RMSEA** | < 0.08 good | 0.070 |
| **IFI** | > 0.8 good | 0.944 |
| **TLI** | > 0.8 good | 0.895 |
| **CFI** | > 0.8 good | 0.942 |
